# Supplementary material
Source: ML conference proceedings conference paper supplement (https://proceedings.mlr.press/v108/uehara20a.html)
Supplement: Supplementary file 3 [file uehara20a-supp.zip]

Archive with 52 entries (41 files):
- unified_code 5/
- unified_code 5/6.2submodular_script/
- unified_code 5/6.2submodular_script/FLID_NCE_obj_light.m
- __MACOSX/
- __MACOSX/unified_code 5/
- __MACOSX/unified_code 5/6.2submodular_script/
- __MACOSX/unified_code 5/6.2submodular_script/._FLID_NCE_obj_light.m
- unified_code 5/6.2submodular_script/submodular.m
- __MACOSX/unified_code 5/6.2submodular_script/._submodular.m
- unified_code 5/6.2submodular_script/FLID_KL_light.m
- __MACOSX/unified_code 5/6.2submodular_script/._FLID_KL_light.m
- unified_code 5/6.2submodular_script/FLID_gamma_obj.m
- __MACOSX/unified_code 5/6.2submodular_script/._FLID_gamma_obj.m
- unified_code 5/6.2submodular_script/minimize.m
- __MACOSX/unified_code 5/6.2submodular_script/._minimize.m
- unified_code 5/6.2submodular_script/FLID_sKL_obj.m
- __MACOSX/unified_code 5/6.2submodular_script/._FLID_sKL_obj.m
- __MACOSX/unified_code 5/._6.2submodular_script
- unified_code 5/.DS_Store
- __MACOSX/unified_code 5/._.DS_Store
- unified_code 5/6.4Misspcified/
- unified_code 5/6.4Misspcified/.DS_Store
- __MACOSX/unified_code 5/6.4Misspcified/
- __MACOSX/unified_code 5/6.4Misspcified/._.DS_Store
- unified_code 5/6.4Misspcified/Discrete_nce_poisson-well-specified.ipynb
- __MACOSX/unified_code 5/6.4Misspcified/._Discrete_nce_poisson-well-specified.ipynb
- unified_code 5/6.4Misspcified/Discrete_nce_poisson-mixture-misspecified-last.ipynb
- __MACOSX/unified_code 5/6.4Misspcified/._Discrete_nce_poisson-mixture-misspecified-last.ipynb
- __MACOSX/unified_code 5/._6.4Misspcified
- unified_code 5/6.1RBM/
- unified_code 5/6.1RBM/.DS_Store
- __MACOSX/unified_code 5/6.1RBM/
- __MACOSX/unified_code 5/6.1RBM/._.DS_Store
- unified_code 5/6.1RBM/func.r
- __MACOSX/unified_code 5/6.1RBM/._func.r
- unified_code 5/6.1RBM/calc-RBM.r
- __MACOSX/unified_code 5/6.1RBM/._calc-RBM.r
- __MACOSX/unified_code 5/._6.1RBM
- unified_code 5/306-supp.pdf
- __MACOSX/unified_code 5/._306-supp.pdf
- unified_code 5/6.3generalizedgamma/
- unified_code 5/6.3generalizedgamma/semipara_new_gamma.R
- __MACOSX/unified_code 5/6.3generalizedgamma/
- __MACOSX/unified_code 5/6.3generalizedgamma/._semipara_new_gamma.R
- unified_code 5/6.3generalizedgamma/semipara_new_nce.R
- __MACOSX/unified_code 5/6.3generalizedgamma/._semipara_new_nce.R
- unified_code 5/6.3generalizedgamma/.DS_Store
- __MACOSX/unified_code 5/6.3generalizedgamma/._.DS_Store
- unified_code 5/6.3generalizedgamma/semipara-new-distribution.R
- __MACOSX/unified_code 5/6.3generalizedgamma/._semipara-new-distribution.R
- __MACOSX/unified_code 5/._6.3generalizedgamma
- __MACOSX/._unified_code 5
