# Supplementary material
Source: ML conference proceedings conference paper supplement (https://proceedings.mlr.press/v108/uehara20a.html)
Supplement: Supplementary file 3 [file uehara20a-supp.zip › unified_code 5/6.4Misspcified/Discrete_nce_poisson-mixture-misspecified-last.ipynb]

# %% [code]
import numpy as np
import scipy as sp
import matplotlib.pyplot as plt
from scipy.special import factorial
%matplotlib inline

from scipy.optimize import minimize
from scipy.optimize import fmin
from scipy.optimize import newton
from scipy.stats import norm
from scipy import optimize
from scipy.special import factorial

# %% [code]
def model(theta,x):
    return theta*x-np.log(factorial(x))

# %% [code]
def model(theta,x):
    return theta*x-np.log(factorial(x))

first_list = []
second_list = []
third_list = []
mle_list = []

number = 1000
for kkk in range(100):
    print kkk
    x1 = np.random.poisson(1.0,number)+1.2
    x3 = np.random.poisson(2.0,number)+0.2
    x1[500:] = x3[500:]
    x2 = np.random.poisson(1.0,number)+1.2
    x4 = np.random.poisson(2.0,number)+0.2
    x2[500:] = x4[500:]
    xx = np.concatenate([x1,x2])

    def emp(x,xx=x2):
        return np.count_nonzero(x==xx)/(number*1.0)
    
    def g1(theta,x1=x1,x2=x2):
        a = [np.exp(-theta[0]+model(theta[1],x1[i]))/(np.exp(-theta[0]+model(theta[1],x1[i]))+emp(x1[i])) for i in range(number)]
        a = np.log(a)
        b = [emp(x2[i])/(np.exp(-theta[0]+model(theta[1],x2[i]))+emp(x2[i])) for i in range(number)]
        b = np.log(b)
        return -np.mean(a)-np.mean(b)
    
    def g2(theta,x1=x1,x2=x2):
        a = [-np.exp(-theta[0]+model(theta[1],x1[i]))/emp(x1[i]) if emp(x1[i])!=0 else 0 for i in range(number)]
        b = [0.5*np.square(np.exp(-theta[0]+model(theta[1],x2[i]))/emp(x2[i])) for i in range(number)]
        return np.mean(a) + np.mean(b)
    
    def g3(theta,x1=x1,x2=x2):
        a = [np.log(np.exp(-theta[0]+model(theta[1],x1[i]))) for i in range(number)]
        b = [np.exp(-theta[0]+model(theta[1],x2[i]))/emp(x2[i]) for i in range(number)]
        return -np.mean(a)+np.mean(b)
                          
    esti1 = minimize(g1,[1.0,1.0])
    esti3 = minimize(g2,[1.0,1.0])
    esti5 = minimize(g3,[1.0,1.0])
    
    def emp(x,xx=x1):
        return np.count_nonzero(x==xx)/(number*1.0)
    '''
    def emp(x,xx=xx):
        return np.power(2.0,x)*np.exp(-2.0)/factorial(x)
        
    '''
    #### JS
    def g1(theta,x1=x2,x2=x1):
        a = [np.exp(-theta[0]+model(theta[1],x1[i]))/(np.exp(-theta[0]+model(theta[1],x1[i]))+emp(x1[i])) for i in range(number)]
        a = np.log(a)
        b = [emp(x2[i])/(np.exp(-theta[0]+model(theta[1],x2[i]))+emp(x2[i])) for i in range(number)]
        b = np.log(b)
        return -np.mean(a)-np.mean(b)
    
    #### Chi
    
    def g2(theta,x1=x2,x2=x1):
        a = [-np.exp(-theta[0]+model(theta[1],x1[i]))/emp(x1[i]) if emp(x1[i])!=0 else 0 for i in range(number)  ]
        b = [0.5*np.square(np.exp(-theta[0]+model(theta[1],x2[i]))/emp(x2[i])) for i in range(number)]
        return np.mean(a) + np.mean(b)
    
    #### KL
    
    def g3(theta,x1=x2,x2=x1):
        a = [np.log(np.exp(-theta[0]+model(theta[1],x1[i]))) for i in range(number)]
        b = [np.exp(-theta[0]+model(theta[1],x2[i]))/emp(x2[i]) for i in range(number)]
        return -np.mean(a)+np.mean(b)

    esti2 = minimize(g1,[1.0,1.0])
    esti4 = minimize(g2,[1.0,1.0])
    esti6 = minimize(g3,[1.0,1.0])
    

    first_list.append(0.5*(esti1.x+esti2.x)[1])
    second_list.append(0.5*(esti3.x+esti4.x)[1])
    third_list.append(0.5*(esti5.x+esti6.x)[1])
    mle_list.append(np.mean(xx))

# %% [code]
first_list = np.exp(first_list)
second_list = np.exp(second_list)
third_list = np.exp(third_list)

# %% [code]
print(np.mean(first_list))
print(np.mean(second_list))
print(np.mean(third_list))
print(np.mean(mle_list))


# %% [code]

### Calcualte Cross entropy 
#### Note that we substracted 460 on the paper. 
#### The relative value is imporant rather than absolute value 

#### mean 
print number*np.mean(1000.0/2000.0*((-1.0-1.2)*np.log(np.array(first_list))+np.array(first_list))+1000.0/2000.0*((-2.0-0.2)*np.log(np.array(first_list))+np.array(first_list)))
print number*np.mean(1000.0/2000.0*((-1.0-1.2)*np.log(np.array(second_list))+np.array(second_list))+1000.0/2000.0*((-2.0-0.2)*np.log(np.array(second_list))+np.array(second_list)))
print number*np.mean(1000.0/2000.0*((-1.0-1.2)*np.log(np.array(third_list))+np.array(third_list))+1000.0/2000.0*((-2.0-0.2)*np.log(np.array(third_list))+np.array(third_list)))
print number*np.mean(1000.0/2000.0*((-1.0-1.2)*np.log(np.array(mle_list))+np.array(mle_list))+1000.0/2000.0*((-2.0-0.2)*np.log(np.array(mle_list))+np.array(mle_list)))
### std

print number*np.std(1000.0/2000.0*((-1.0-1.2)*np.log(np.array(first_list))+np.array(first_list))+1000.0/2000.0*((-2.0-0.2)*np.log(np.array(first_list))+np.array(first_list)))
print number*np.std(1000.0/2000.0*((-1.0-1.2)*np.log(np.array(second_list))+np.array(second_list))+1000.0/2000.0*((-2.0-0.2)*np.log(np.array(second_list))+np.array(second_list)))
print number*np.std(1000.0/2000.0*((-1.0-1.2)*np.log(np.array(third_list))+np.array(third_list))+1000.0/2000.0*((-2.0-0.2)*np.log(np.array(third_list))+np.array(third_list)))
print number*np.std(1000.0/2000.0*((-1.0-1.2)*np.log(np.array(mle_list))+np.array(mle_list))+1000.0/2000.0*((-2.0-0.2)*np.log(np.array(mle_list))+np.array(mle_list)))


# %% [code]
