# Supplementary material
Source: ML conference proceedings conference paper supplement (https://proceedings.mlr.press/v108/uehara20a.html)
Supplement: Supplementary file 3 [file uehara20a-supp.zip › unified_code 5/6.4Misspcified/Discrete_nce_poisson-well-specified.ipynb]

# %% [code]
import numpy as np
import scipy as sp
import matplotlib.pyplot as plt
from scipy.special import factorial
%matplotlib inline

from scipy.optimize import minimize
from scipy.optimize import fmin
from scipy.optimize import newton
from scipy.stats import norm
from scipy import optimize
from scipy.special import factorial

# %% [code]
def model(theta,x):
    return theta*x-np.log(factorial(x))


# %% [code]
def model(theta,x):
    return theta*x-np.log(factorial(x))

first_list = []
second_list = []
third_list = []
mle_list = []

number = 1000
for kkk in range(100):
    print kkk
    x1 = np.random.poisson(2.0,number)
    x2 = np.random.poisson(2.0,number)
    xx = np.concatenate([x1,x2])

    def emp(x,xx=x2):
        return np.count_nonzero(x==xx)/(number*1.0)
    
    '''
    def emp(x,xx=xx):
        return np.power(2.0,x)*np.exp(-2.0)/factorial(x)
    '''
    
    #### JS 
    
    def g1(theta,x1=x1,x2=x2):
        a = [np.exp(-theta[0]+model(theta[1],x1[i]))/(np.exp(-theta[0]+model(theta[1],x1[i]))+emp(x1[i])) for i in range(number)]
        a = np.log(a)
        b = [emp(x2[i])/(np.exp(-theta[0]+model(theta[1],x2[i]))+emp(x2[i])) for i in range(number)]
        b = np.log(b)
        return -np.mean(a)-np.mean(b)
    
    ### Chi
    
    def g2(theta,x1=x1,x2=x2):
        a = [-np.exp(-theta[0]+model(theta[1],x1[i]))/emp(x1[i]) if emp(x1[i])!=0 else 0 for i in range(number)]
        b = [0.5*np.square(np.exp(-theta[0]+model(theta[1],x2[i]))/emp(x2[i])) for i in range(number)]
        return np.mean(a) + np.mean(b)
    
    #### KL
    
    def g3(theta,x1=x1,x2=x2):
        a = [np.log(np.exp(-theta[0]+model(theta[1],x1[i]))) for i in range(number)]
        b = [np.exp(-theta[0]+model(theta[1],x2[i]))/emp(x2[i]) for i in range(number)]
        return -np.mean(a)+np.mean(b)
                          
    esti1 = minimize(g1,[1.0,1.0])
    esti3 = minimize(g2,[1.0,1.0])
    esti5 = minimize(g3,[1.0,1.0])
    
    def emp(x,xx=x1):
        return np.count_nonzero(x==xx)/(number*1.0)
    '''
    def emp(x,xx=xx):
        return np.power(2.0,x)*np.exp(-2.0)/factorial(x)
    '''
    def g1(theta,x1=x2,x2=x1):
        a = [np.exp(-theta[0]+model(theta[1],x1[i]))/(np.exp(-theta[0]+model(theta[1],x1[i]))+emp(x1[i])) for i in range(number)]
        a = np.log(a)
        b = [emp(x2[i])/(np.exp(-theta[0]+model(theta[1],x2[i]))+emp(x2[i])) for i in range(number)]
        b = np.log(b)
        return -np.mean(a)-np.mean(b)
    
    
    def g2(theta,x1=x2,x2=x1):
        a = [-np.exp(-theta[0]+model(theta[1],x1[i]))/emp(x1[i]) if emp(x1[i])!=0 else 0 for i in range(number)  ]
        b = [0.5*np.square(np.exp(-theta[0]+model(theta[1],x2[i]))/emp(x2[i])) for i in range(number)]
        return np.mean(a) + np.mean(b)
    
    def g3(theta,x1=x2,x2=x1):
        a = [np.log(np.exp(-theta[0]+model(theta[1],x1[i]))) for i in range(number)]
        b = [np.exp(-theta[0]+model(theta[1],x2[i]))/emp(x2[i]) for i in range(number)]
        return -np.mean(a)+np.mean(b)

    esti2 = minimize(g1,[1.0,1.0])
    esti4 = minimize(g2,[1.0,1.0])
    esti6 = minimize(g3,[1.0,1.0])
    
    ####third_list.append([esti1.x[1],esti2.x[1]])
    first_list.append(0.5*(esti1.x+esti2.x)[1])
    second_list.append(0.5*(esti3.x+esti4.x)[1])
    third_list.append(0.5*(esti5.x+esti6.x)[1])
    mle_list.append(np.mean(xx))
    ###second_list.append([esti1.x[1],esti2.x[1]])
    ####third_list.append(np.log(np.mean(xx)))

# %% [code]
#### mean 

print number*np.mean(np.square(first_list-np.log(2.0)))
print number*np.mean(np.square(second_list-np.log(2.0)))
print number*np.mean(np.square(third_list-np.log(2.0)))

### std 

print number*np.std(np.square(first_list-np.log(2.0)))
print number*np.std(np.square(second_list-np.log(2.0)))
print number*np.std(np.square(third_list-np.log(2.0)))

# %% [code]
first_list = np.exp(first_list)
second_list = np.exp(second_list)
third_list = np.exp(third_list)


# %% [code]
const = number*np.mean((-2.0)*np.log(np.array(2.0))+np.array(2.0))

# %% [code]
print number*np.mean((-2.0)*np.log(np.array(first_list))+np.array(first_list))-const
print number*np.mean((-2.0)*np.log(np.array(second_list))+np.array(second_list))-const
print number*np.mean((-2.0)*np.log(np.array(third_list))+np.array(third_list))-const
print number*np.mean((-2.0)*np.log(np.array(mle_list))+np.array(mle_list))-const

# %% [code]
print number*np.std((-2.0)*np.log(np.array(first_list))+np.array(first_list))
print number*np.std((-2.0)*np.log(np.array(second_list))+np.array(second_list))
print number*np.std((-2.0)*np.log(np.array(third_list))+np.array(third_list))
print number*np.std((-2.0)*np.log(np.array(mle_list))+np.array(mle_list))

# %% [code]
